# Supplementary material
Source: PubMed Central journal article supplement (PMC4939101)
Supplement: NIHMS796113-supplement-2.pdf [file NIHMS796113-supplement-2.pdf]

|                                                        | <b>Adult Human</b>         | <b>Adult Primate</b> | <b>Adult Pig</b>                  | <b>Adult Rat</b>                  |
|--------------------------------------------------------|----------------------------|----------------------|-----------------------------------|-----------------------------------|
| <b>Lobes [1,3]</b>                                     | 5 (3 right, 2 left)        | 6 (4 right, 2 left)  | 6 (4 right, 2 left)               | 5 (4 right, 1 left)               |
| <b>Interlobar and segmental connective tissue [3]</b>  | Extensive and interlobular | Little if any        | Extensive and interlobular        | Little                            |
| <b>Total lung capacity (mL) [4, 5]</b>                 | 6,500                      | 230                  | 5,000                             | 11                                |
| <b>Alveolar size (µm) [1, 6, 7]</b>                    | ~200-400                   | 196                  | ~130-134                          | ~70-90                            |
| <b>Septal thickness (µm) [8, 9]</b>                    | ~ 3.3                      | ~ 2.2                | ~7-8                              | ~1.2                              |
| <b>Visceral Pleural thickness (mm) [9]</b>             | ~70-100 µm                 | ~ 10-25              | ~ 50-80                           | ~2-5                              |
| <b>Lung compliance (cm H20) [4, 10]</b>                | ~4,000                     | ~750                 | ~750                              | ~11                               |
| <b>Visceral pleura lymphatics [3]</b>                  | Extensive                  | Few                  | Extensive                         | Very Few                          |
| <b>Nonrespiratory bronchiole (nonalveolarized) [3]</b> | Several generations        | Fewer generations    | Several generations               | Several generations               |
| <b>Respiratory bronchiole (alveolarized) [3, 5]</b>    | Several generations        | Several generations  | Absent or short single generation | Absent or short single generation |

1. Hoyt, J.R., Hawkins, J. V., St Clair, M. B., & Kennett, M. J. , *The Mouse in Biomedical Research: Normative Biology, Husbandry, and Models* 2nd ed. 2006, Burlington, Massachusetts: Academic Press.
2. Plopper, C.G. and J.R. Harkema, *The Respiratory System and its Use in Research. In S. Wolfe-Coote (Ed.) The Laboratory Primate*. 2005, London, United Kingdom: Academic Press.
3. WS, T. and J. MD, *Gross and subgross anatomy of the lungs, pleura, connective tissue septae, distal airways, and structural units.* , in *Comparative Biology of the Normal Lung*, P. RA, Editor. 1992, CRC Press: Boca Raton. p. 37-47.
4. Weibel, E.R., *Dimensions of the tracheobronchial tree and alveoli*. Biological Handbooks: Respiration and Circulation. , ed. P.L. Altman and D.S. Dittmer. 1971, Bethesda, MD: Federation of American Societies for Experimental Biology.
5. Pinkerton, K.E., P. Gehr, and J.D. Crapo, *Architecture and cellular composition of the air-blood barrier*. *Comparative Biology of the Normal Lung*, 1992. **1**: p. 121-128.
6. Mercer, R.R., M.L. Russell, and J.D. Crapo, *Alveolar septal structure in different species*. *J Appl Physiol* (1985), 1994. **77**(3): p. 1060-6.
7. Lum, H. and W. Mitzner, *A species comparison of alveolar size and surface forces*. *J Appl Physiol* (1985), 1987. **62**(5): p. 1865-71.
8. Mansell, A.L., et al., *Postnatal growth of lung parenchyma in the piglet: morphometry correlated with mechanics*. *Anat Rec*, 1995. **241**(1): p. 99-104.
9. *Section 3- Selected Biological Properties of Tissues: Potential Determinants of Susceptibility to Ultrasound-Induced Bioeffects.* . *Journal of ultrasound in medicine: official journal of the American Institute of Ultrasound in Medicine.* , 2000. **19**(2): p. 85-168.
10. JW., W., *Elastin, resistive, and inertial properties of the lung*. *Cmparative Biology of the Normal Lung*, ed. P. RA. Vol. 1. 1992, Boca Raton, FL: CRC Press.
