# Supplementary material
Source: PubMed Central journal article supplement (PMC4939101)
Supplement: NIHMS796113-supplement-4.pdf [file NIHMS796113-supplement-4.pdf]

■ GAG  
 ■ Collagen  
 ■ Elastin

**A**

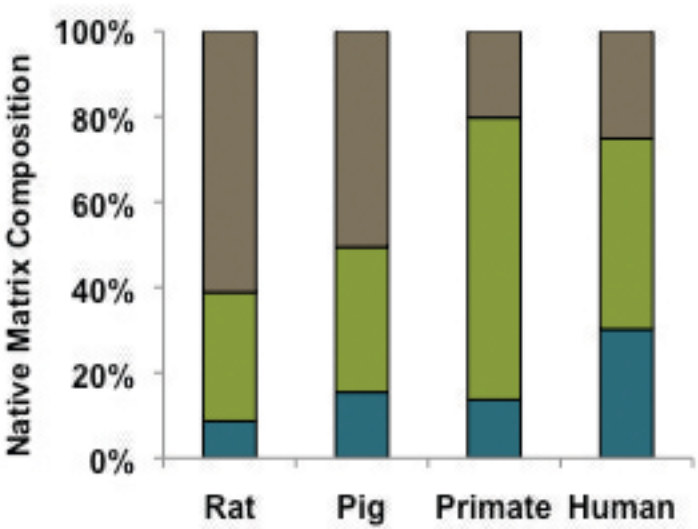

**B**

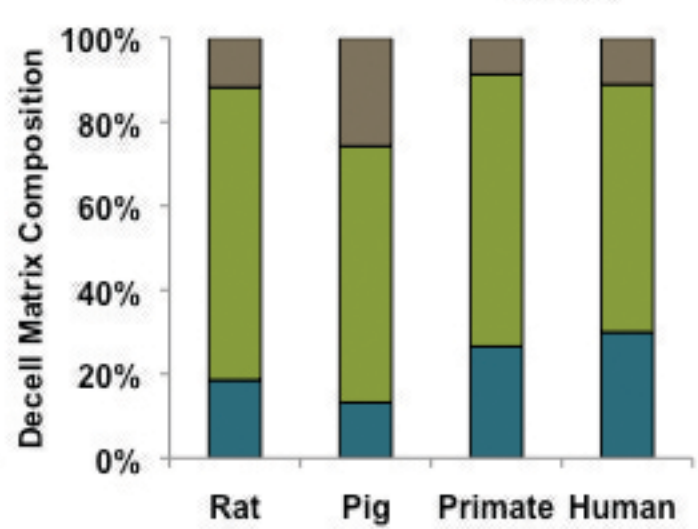

**C**

|         | $F_{GAG}$ |        | $F_{collagen}$ |        | $F_{elastin}$ |        |
|---------|-----------|--------|----------------|--------|---------------|--------|
|         | Native    | Decell | Native         | Decell | Native        | Decell |
| Human   | 25%       | 11%    | 45%            | 59%    | 30%           | 30%    |
| Primate | 20%       | 9%     | 66%            | 65%    | 14%           | 26%    |
| Pig     | 51%       | 26%    | 34%            | 61%    | 15%           | 13%    |
| Rat     | 61%       | 12%    | 30%            | 70%    | 9%            | 18%    |

**Supplemental Figure E2. Matrix fractions of each component.** To determine the **final** fractions of A) native and decellularized B) matrix relative to total ECM, dry weights of total GAGs, collagen, and elastin were summed, and each constituent was then normalized to the total matrix ( $F_{GAG} + F_{collagen} + F_{elastin} = 1$ ). C) Raw values of each ECM fraction.
