# Supplementary material
Source: PubMed Central journal article supplement (PMC4939101)
Supplement: NIHMS796113-supplement-5.pdf [file NIHMS796113-supplement-5.pdf]

|                                     |               | <u>Human</u>  | <u>Primate</u> | <u>Pig</u>   | <u>Rat</u>    |
|-------------------------------------|---------------|---------------|----------------|--------------|---------------|
| <b>Total GAG (ug/mg dry tissue)</b> | <i>Native</i> | 163.9 ± 32.2  | 131.7 ± 63.1   | 204.0 ± 49.8 | 335.3 ± 59.1  |
|                                     | <i>Decell</i> | 101.0 ± 30.7  | 88.4 ± 33.1    | 212.3 ± 25.8 | 110.2 ± 29.7  |
| <b>sGAG (ug/mg dry tissue)</b>      | <i>Native</i> | 4.3 ± 2.5     | 9.7 ± 1.7      | 6.1 ± 0.9    | 13.0 ± 3.8    |
|                                     | <i>Decell</i> | 1.6 ± 1.5     | 4.0 ± 1.2      | 6.3 ± 1.7    | 4.0 ± 1.3     |
| <b>Collagen (ug/mg dry tissue)</b>  | <i>Native</i> | 250.3 ± 93.6  | 429.4 ± 14.5   | 137.3 ± 35.3 | 165.5 ± 26.1  |
|                                     | <i>Decell</i> | 537.5 ± 125.0 | 659.2 ± 48.2   | 502.8 ± 68.9 | 652.5 ± 124.6 |
| <b>Elastin (ug/mg dry tissue)</b>   | <i>Native</i> | 180.4 ± 49.3  | 91.2 ± 15.0    | 62.2 ± 19.4  | 47.5 ± 23.2   |
|                                     | <i>Decell</i> | 272.4 ± 92.0  | 270.5 ± 69.3   | 108.9 ± 6.2  | 174.1 ± 45.6  |
| <b>DNA (ug/mg dry tissue)</b>       | <i>Native</i> | 53.2 ± 17.3   | 18.1 ± 3.3     | 24.1 ± 6.3   | 17.3 ± 3.5    |
|                                     | <i>Decell</i> | 0.1 ± 0.2     | 0.3 ± 0.3      | 1.6 ± 0.6    | 1.8 ± 1.0     |

**Table E1.**
