# Supplementary material
Source: PubMed Central journal article supplement (PMC4939101)

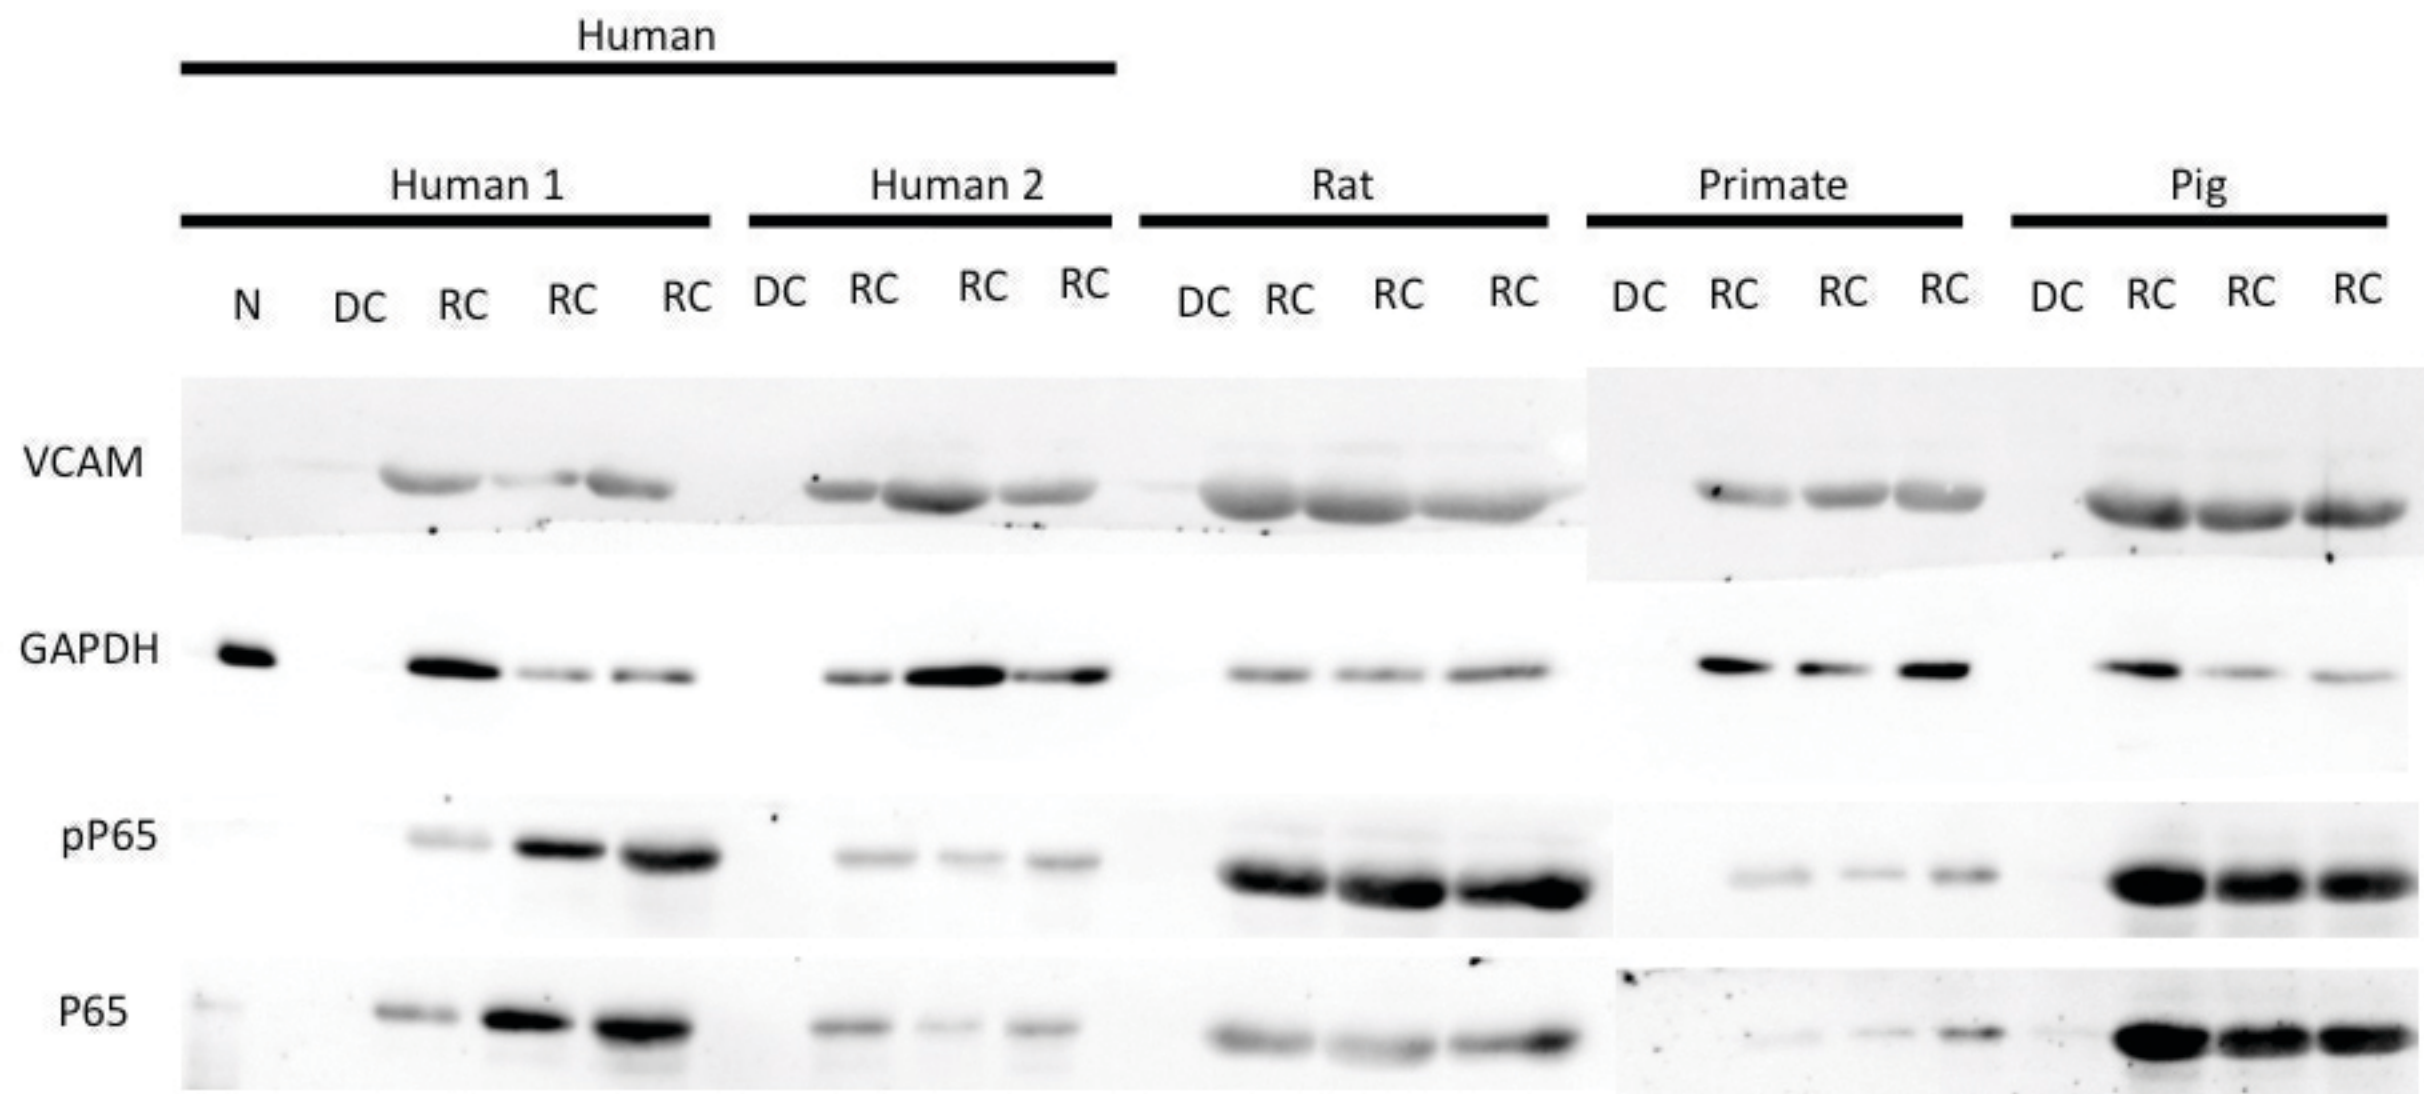

Supplement: NIHMS796113-supplement-1.pdf [file NIHMS796113-supplement-1.pdf]
